# Supplementary material for: Identification of Potential Surface Water Resources for Inland Aquaculture from Sentinel-2 Images of the Rwenzori Region of Uganda
Source: MDPI journal article supplement (doi:10.3390/w13192657), 2021-09-26
Supplement: s1 [file s1]

Supplementary material

# Identification of Potential Surface Water Resources for Inland Aquaculture from Sentinel-2 Images of the Rwenzori Region of Uganda

Athanasius Ssekyanzi <sup>1,2</sup>, Nancy Nevejan<sup>1</sup>, Dimitry Van der Zande <sup>3</sup>, Molly E Brown <sup>4</sup>, Gilbert Van Stappen <sup>1</sup>

<sup>1</sup> Laboratory of Aquaculture & Artemia Reference Center, Department of Animal Sciences and Aquatic Ecology, Ghent University, Coupure links 653, B-9000 Gent, Belgium; Athanasius.Ssekyanzi@UGent.be

<sup>2</sup> School of Agriculture and Environmental Sciences, Mountains of the Moon University, P.O. Box 367, Fort Portal, Uganda; ssekyanziarthur@gmail.com

<sup>3</sup> Royal Belgian Institute of Natural Sciences, Operational Directorate Natural Environment, Brussels, Belgium; dvanderzande@naturalsciences.be

<sup>4</sup> Natural Resources Institute, University of Greenwich, Central Avenue, Chatham Maritime, Kent ME4 4TB, UK; M.E.Brown@greenwich.ac.uk

\* Correspondence: ssekyanziarthur@gmail.com/Athanasius.Ssekyanzi@UGent.be; Tel.: +256-773-962035

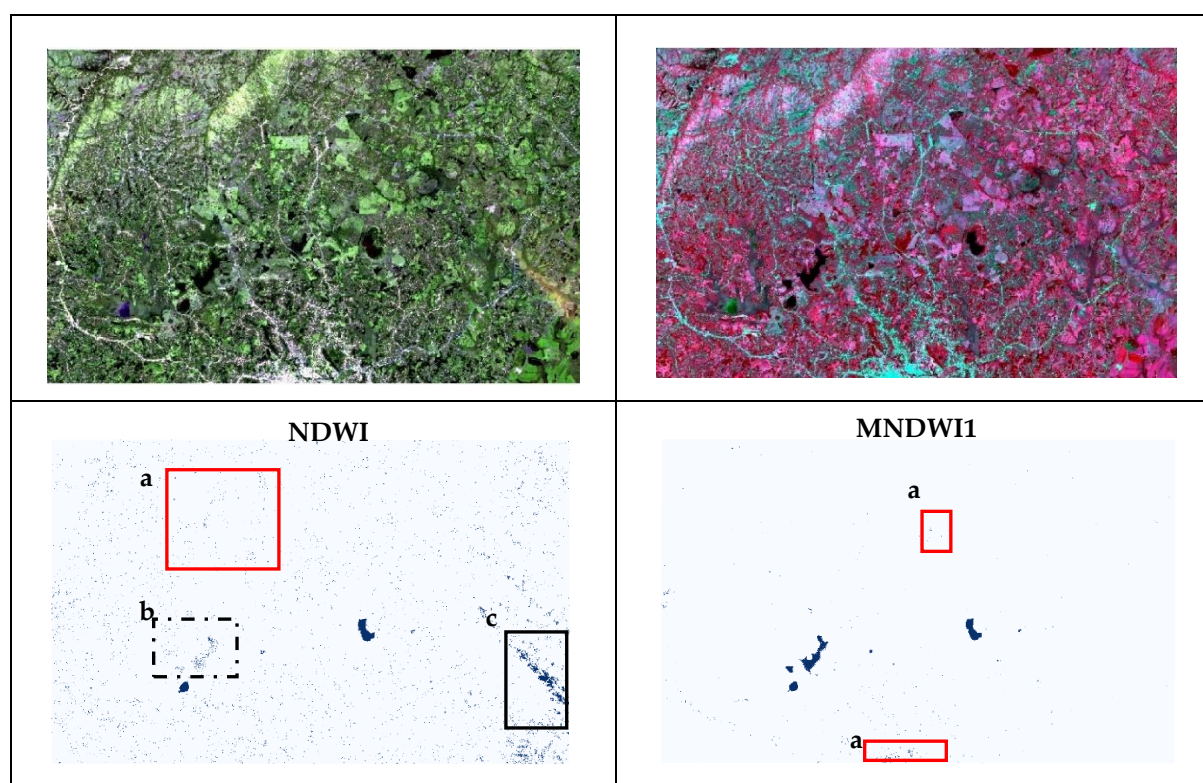

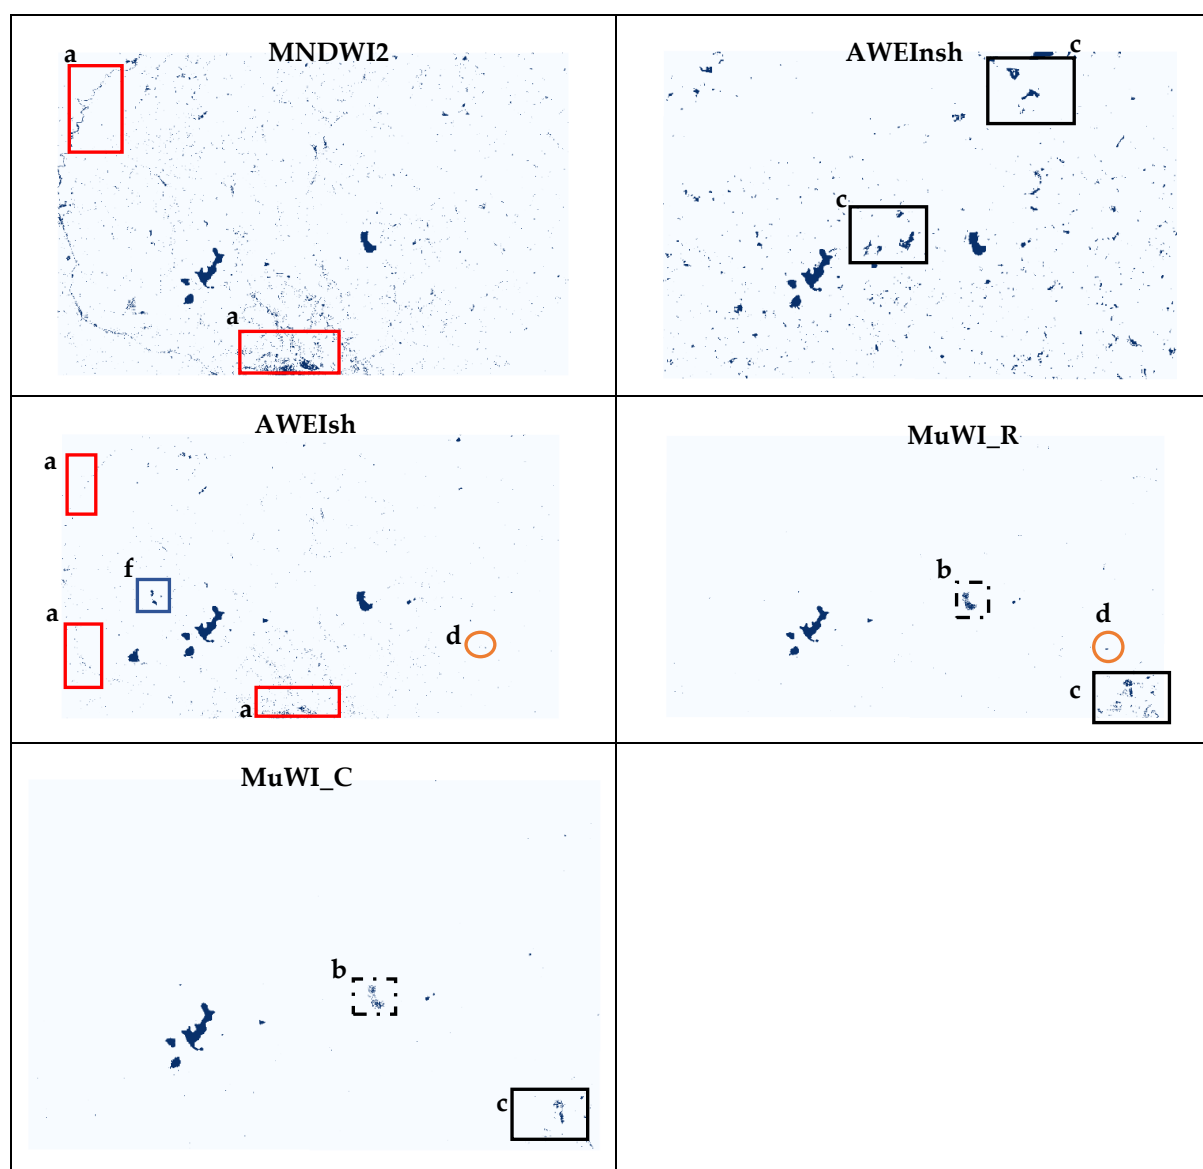

**Figure S1.** Comparing cases of surface water extraction in site 1. Top left is Sentinel-2 MSI RGB (4,3,2) 10m natural-color image, top right is Sentinel-2 MSI RGB (8,4,3) false-color composite. This is followed by the corresponding water maps as classified by the respective spectral water indices. The red rectangles (a) are built-up areas misclassified as water, dotted black rectangles (b) show blurred waterbodies, black rectangles (c) are vegetated areas (forests and other vegetation) misclassified as water, orange circles (d) shows small ponds (fishponds), while blue rectangles (f) is water in swampy (wetland) areas.

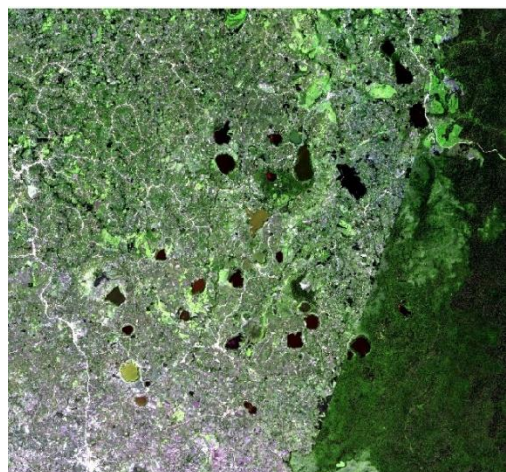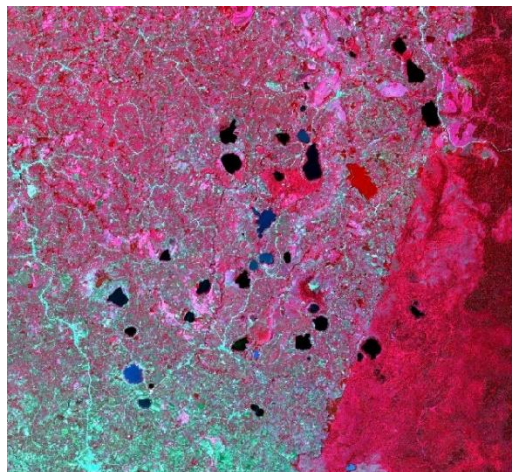

NDWI

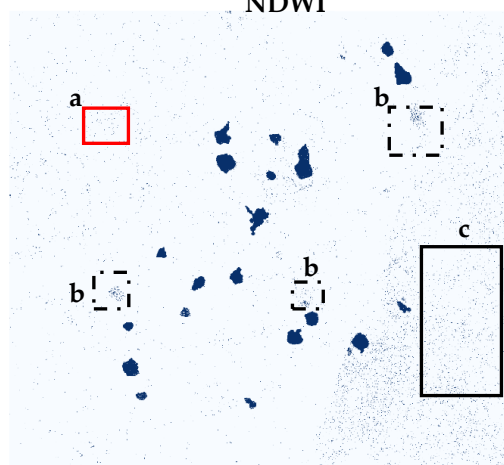

MNDWI1

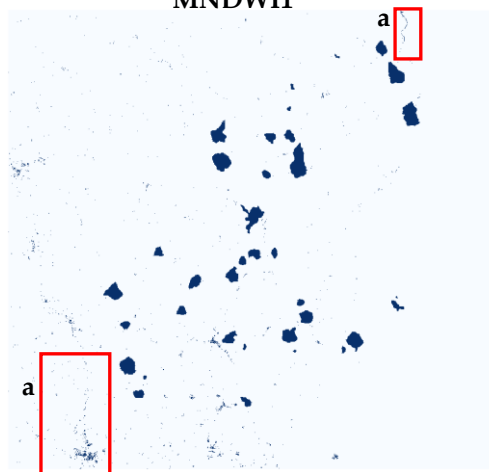

MNDWI2

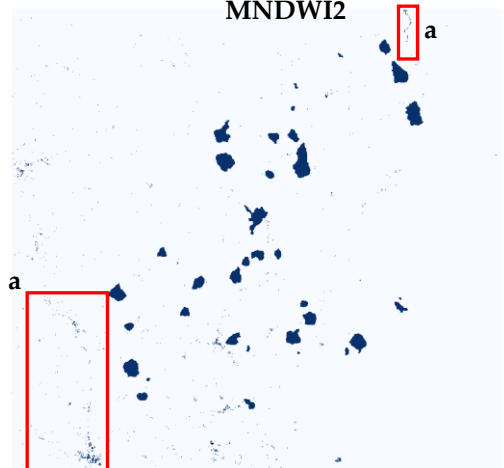

AWEInsh

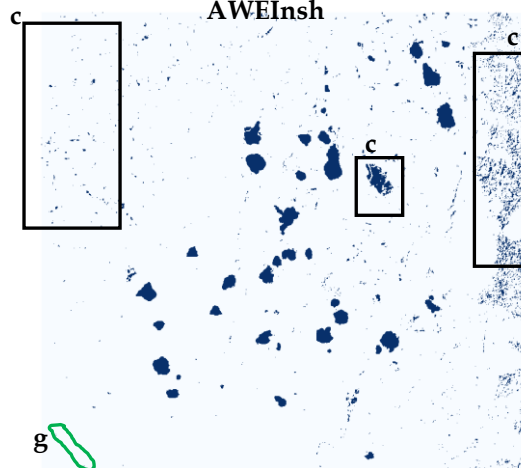

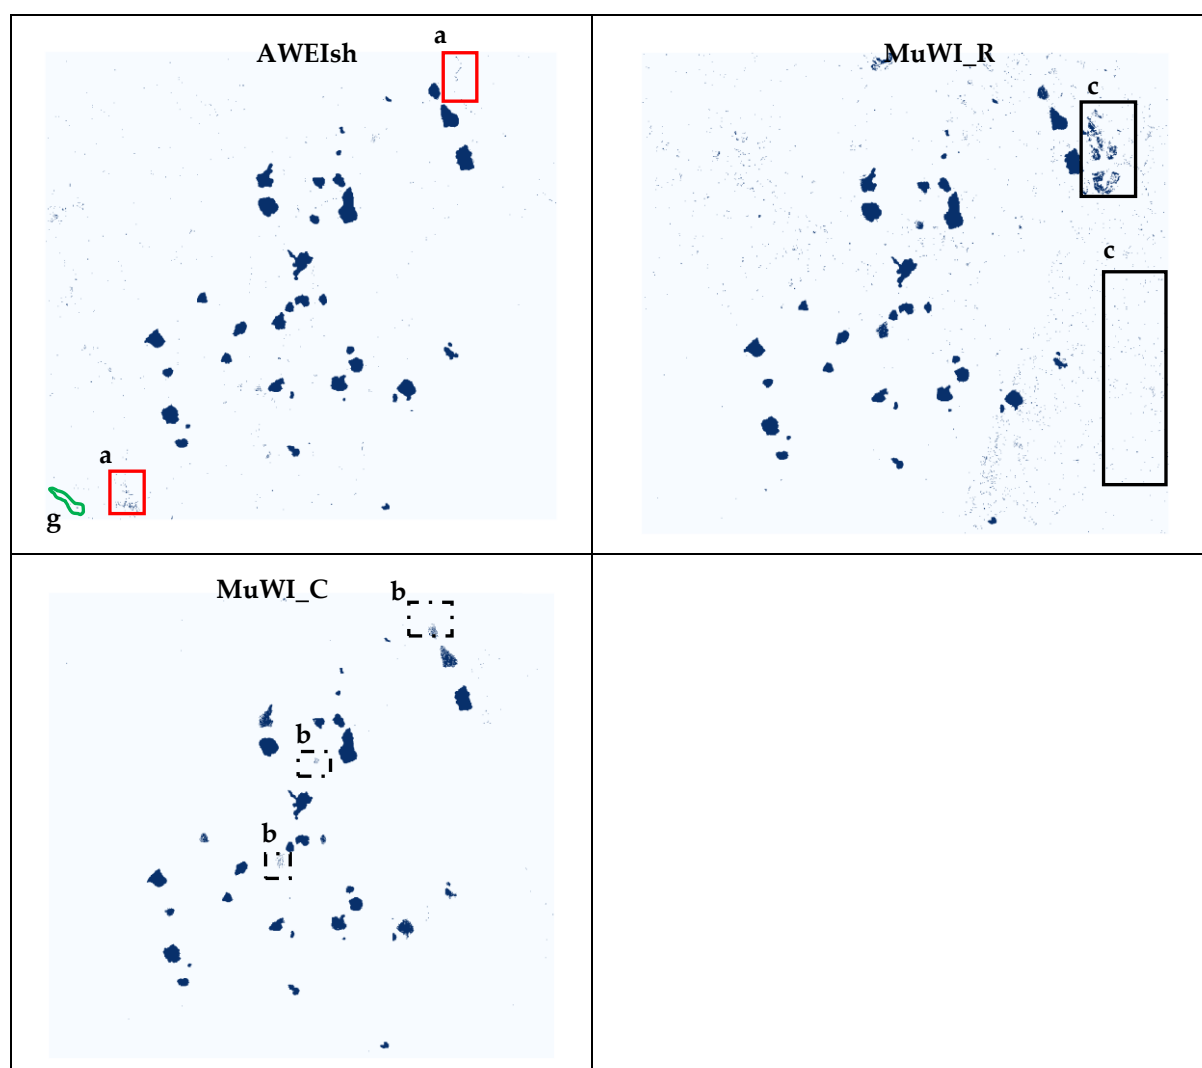

**Figure S2.** Comparing cases of surface water extraction in site 2. Top left is Sentinel-2 MSI RGB (4,3,2) 10m natural-color image, top right is Sentinel-2 MSI RGB (8,4,3) false-color composite. This is followed by the corresponding water maps as classified by the respective spectral water indices. The red rectangles (a) are built-up areas misclassified as water, dotted black rectangles (b) show blurred waterbodies, black rectangles (c) are vegetated areas (forests and other vegetation) misclassified as water, while (g) are discontinuous portions of narrow rivers.

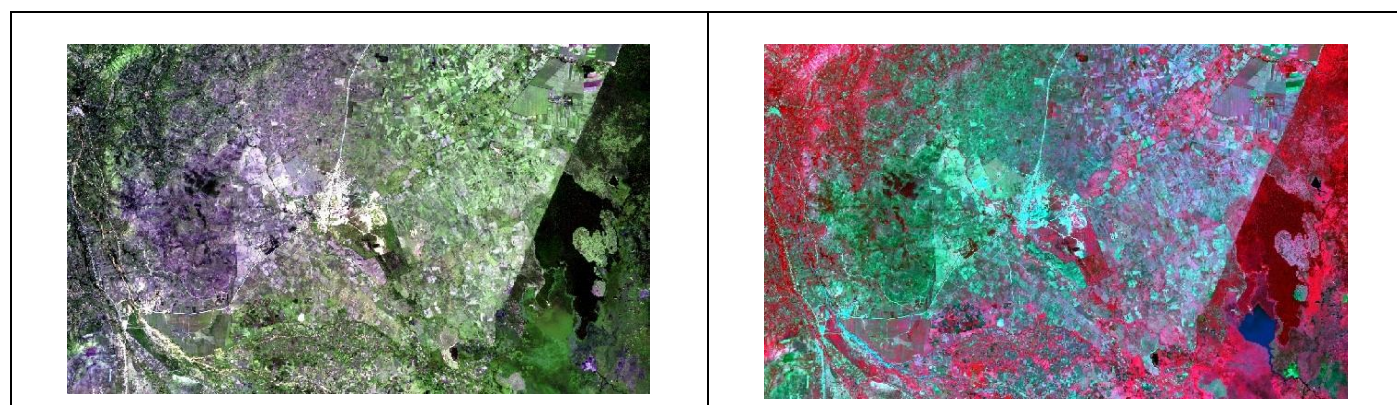



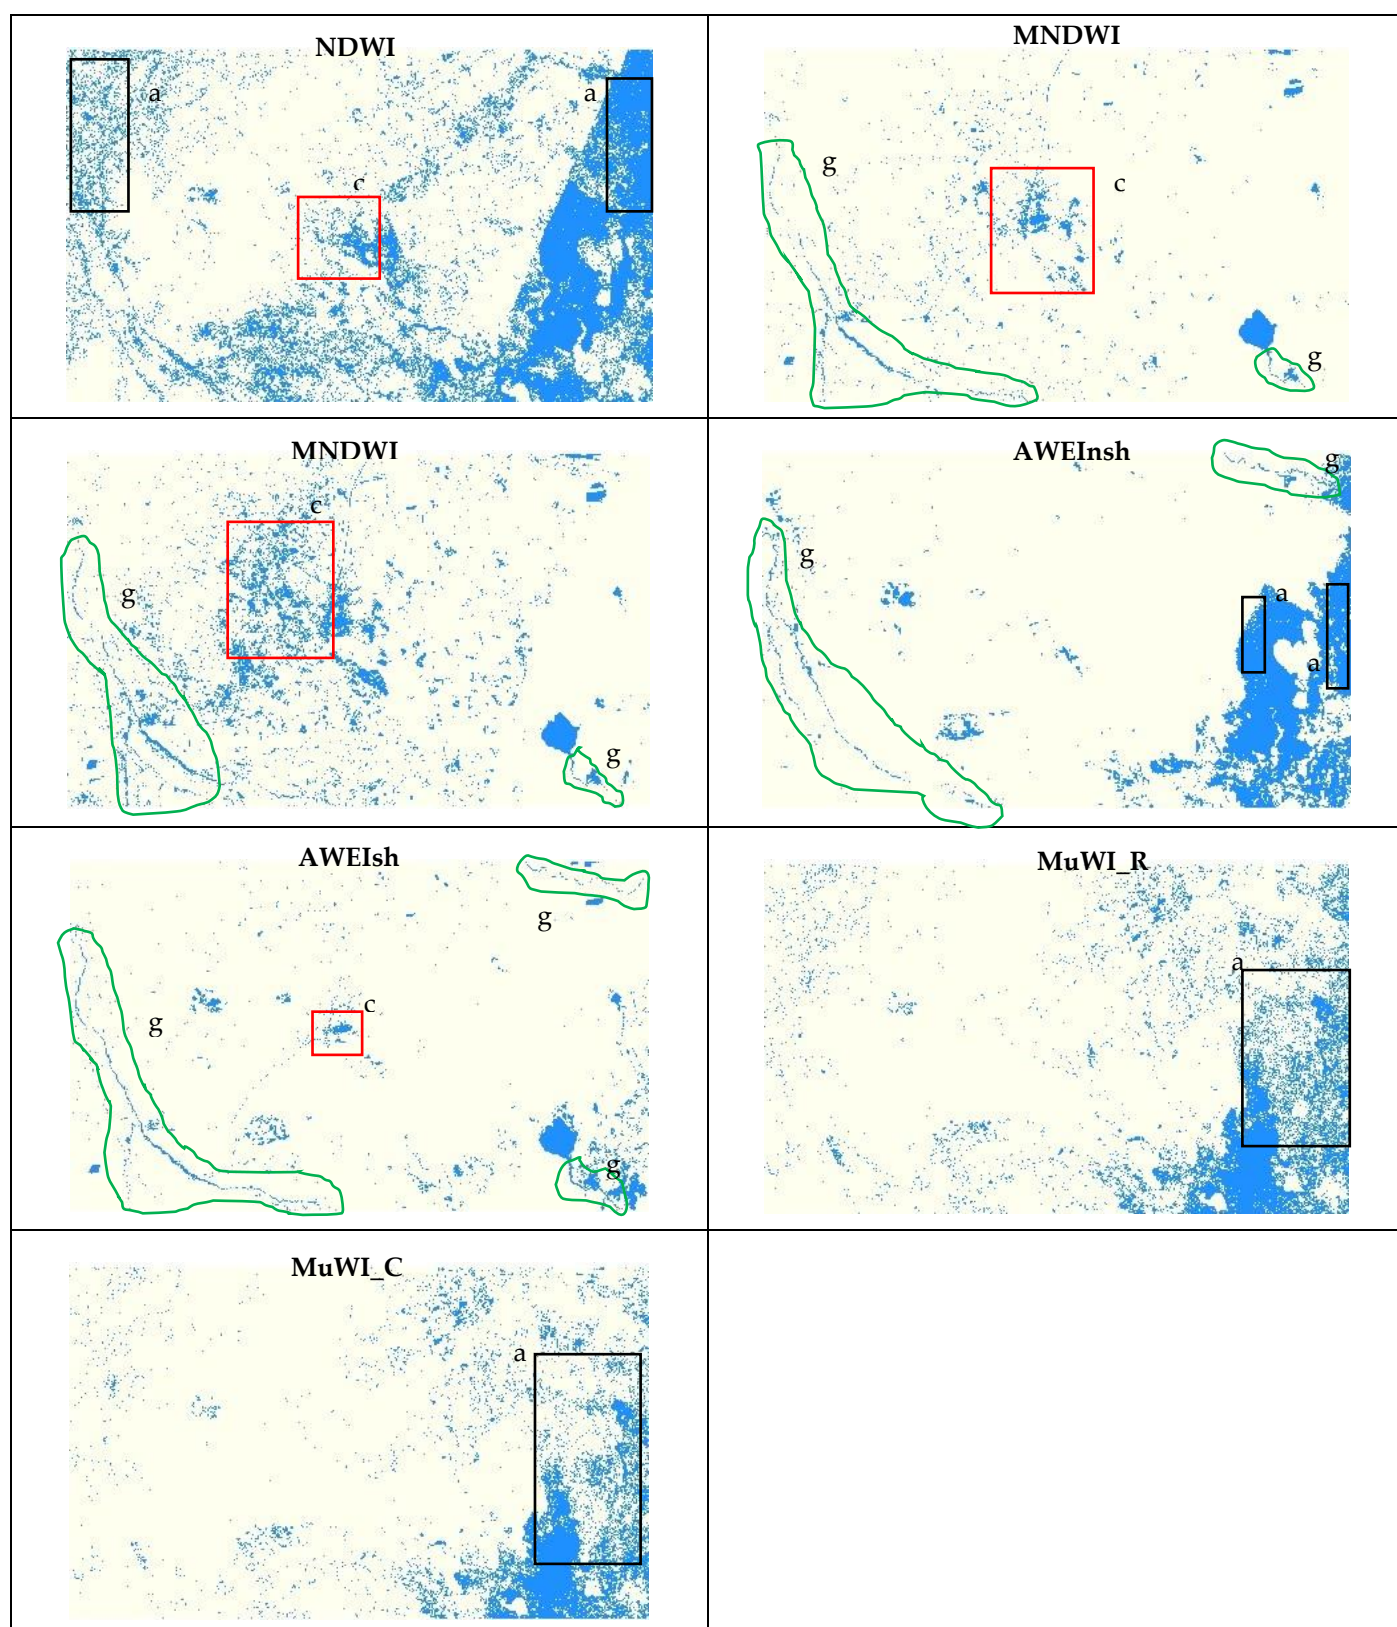

**Figure S3.** Comparing cases of surface water extraction in site 3. Top left is Sentinel-2 MSI RGB (4,3,2) 10m natural-color image, top right is Sentinel-2 MSI RGB (8,4,3) false-color composite. This is followed by the corresponding water maps as classified by the respective spectral water indices. The red rectangles (a) are built-up areas misclassified as water, black rectangles (c) are vegetated areas (forests and other vegetation) misclassified as water, orange circles (d), while (g) are discontinuous portions of narrow rivers.

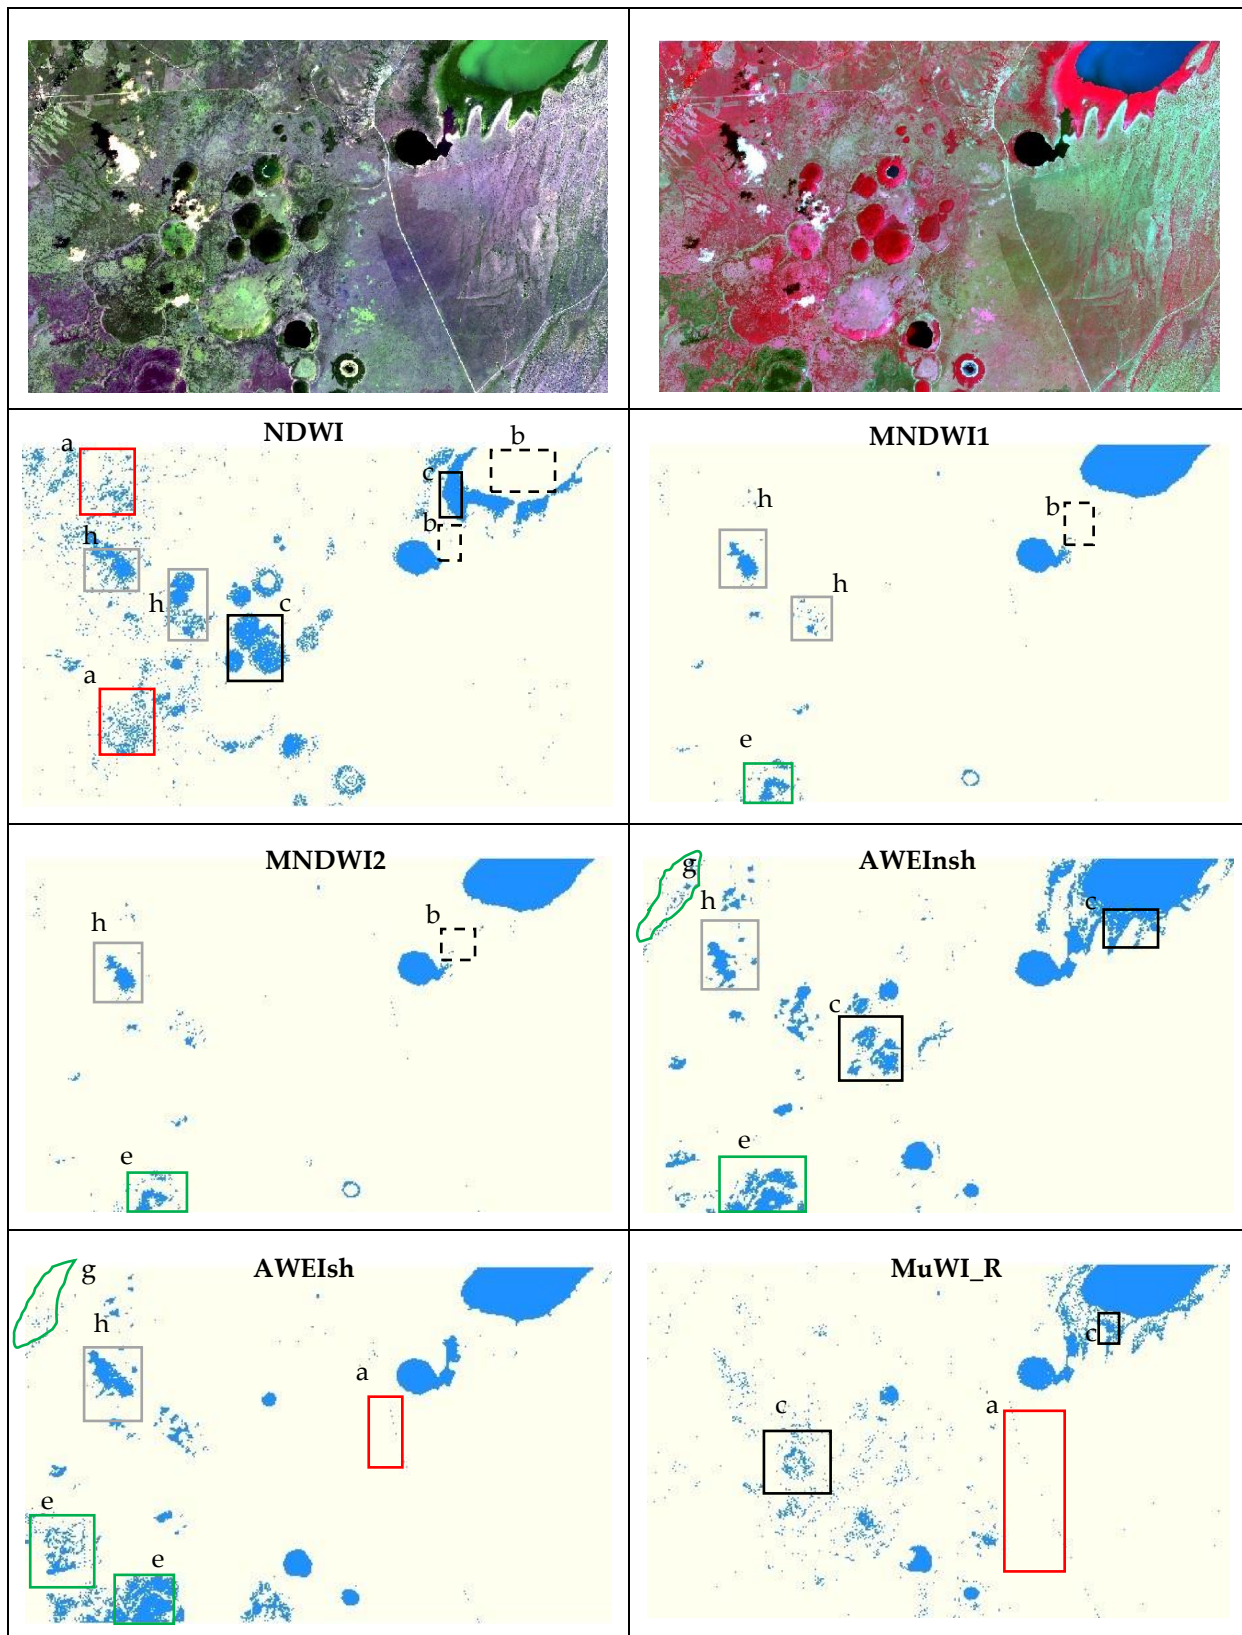

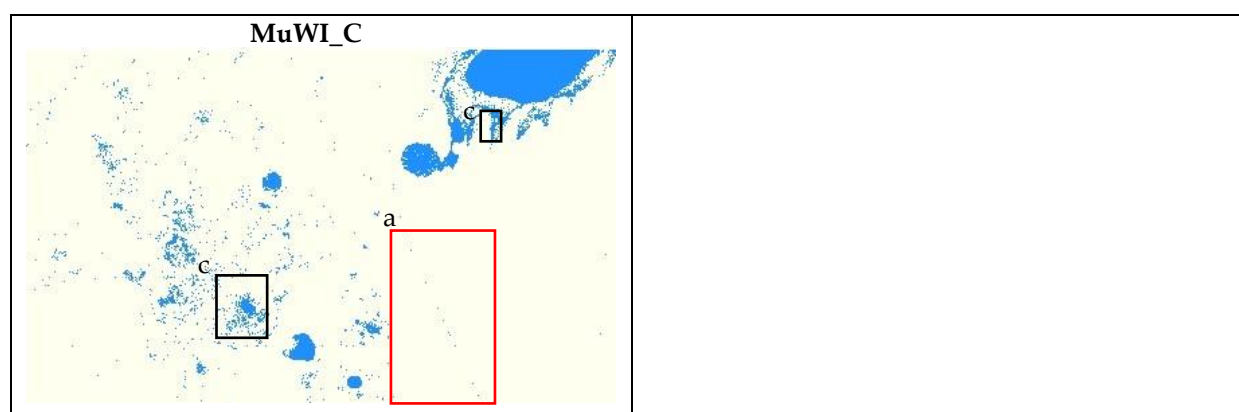

**Figure S4.** Comparing cases of surface water extraction in site 4. Top left is Sentinel-2 MSI RGB (4,3,2) 10m natural-color image, top right is Sentinel-2 MSI RGB (8,4,3) false-color composite. This is followed by the corresponding water maps as classified by the respective spectral water indices. The red rectangles (a) are built-up areas misclassified as water, dotted black rectangles (b) show blurred waterbodies, black rectangles (c) are vegetated areas (forests and tea estates) misclassified as water, green rectangles (e) is bare ground misclassified as water, while (g) are discontinuous portions of narrow rivers, and grey rectangles (h) clouds/cloud shadows misclassified as water.

**Table S5.** K-means cluster centers, where the optimum threshold (the center that gave the highest OA and kappa) is highlighted.

| Site 1         |       |        |        |          |           |        |        |
|----------------|-------|--------|--------|----------|-----------|--------|--------|
| Cluster center | NDWI  | MNDWI1 | MNDWI2 | AWEIsh   | AWEInsh   | MuWI_C | MuWI_R |
| 1              | -0.27 | -0.60  | -0.10  | -5926.58 | -16209.74 | 2.39   | 0.08   |
| 2              | 0.14  | -0.03  | -0.77  | -3166.10 | -11294.86 | 7.47   | -0.68  |
| 3              | -0.41 | -0.84  | -0.36  | -4349.30 | -12176.02 | 0.69   | 2.77   |
| 4              | -0.24 | -0.49  | -0.86  | -5493.35 | -8619.31  | -3.07  | -0.06  |
| 5              | -0.21 | -0.68  | -0.83  | -5000.62 | -14344.24 | 1.53   | -0.39  |
| 6              | -0.32 | -0.29  | -0.72  | -6839.84 | -13159.25 | 3.33   | 0.96   |
| 7              | -0.07 | -0.73  | -0.80  | 73.44    | -7050.44  | -0.22  | 0.36   |
| 8              | -0.18 | -0.77  | -0.65  | -8286.82 | -9596.69  | 19.83  | 0.54   |
| 9              | -0.15 | -0.81  | -0.54  | -6359.41 | -10458.41 | 4.54   | -0.21  |
| 10             | -0.12 | -0.88  | -0.90  | -7410.16 | -444.37   | -1.33  | 0.21   |

| Site 2         |       |        |        |          |           |        |        |
|----------------|-------|--------|--------|----------|-----------|--------|--------|
| Cluster center | NDWI  | MNDWI1 | MNDWI2 | AWEIsh   | AWEInsh   | MuWI_C | MuWI_R |
| 1              | -0.22 | -0.80  | -0.69  | -2928.46 | -11783.30 | -2.69  | -0.06  |
| 2              | -0.25 | -0.57  | -0.90  | -5199.38 | -270.36   | 12.17  | -0.61  |
| 3              | -0.15 | -0.66  | -0.46  | -6411.62 | -8336.82  | 3.97   | 0.24   |
| 4              | -0.04 | -0.76  | -0.79  | -4740.54 | -13910.72 | 0.66   | 0.08   |
| 5              | -0.18 | -0.84  | -0.74  | -5596.51 | -10132.42 | 2.62   | -0.22  |
| 6              | -0.34 | -0.43  | 0.05   | 276.99   | -7201.59  | 1.59   | 1.59   |
| 7              | 0.10  | -0.11  | -0.61  | -5986.37 | -12700.91 | -0.26  | -0.38  |
| 8              | -0.12 | 0.09   | -0.83  | -4140.40 | -10951.91 | 7.77   | 0.42   |
| 9              | -0.09 | -0.88  | -0.15  | -7658.28 | -15888.88 | 17.76  | 0.68   |
| 10             | -0.29 | -0.72  | -0.86  | -6929.70 | -9276.21  | -1.28  | 2.61   |

| Site 3         |      |        |        |        |         |        |        |
|----------------|------|--------|--------|--------|---------|--------|--------|
| Cluster center | NDWI | MNDWI1 | MNDWI2 | AWEIsh | AWEInsh | MuWI_C | MuWI_R |



|    |       |       |       |          |           |       |       |
|----|-------|-------|-------|----------|-----------|-------|-------|
| 1  | -0.34 | -0.58 | -0.81 | -2665.28 | -16286.55 | -0.26 | -0.24 |
| 2  | -0.29 | -0.75 | -0.66 | -5022.17 | -18559.13 | 1.35  | 0.32  |
| 3  | -0.13 | -0.38 | -0.85 | -4593.32 | -12848.25 | 3.54  | 0.00  |
| 4  | -0.09 | -0.67 | -0.41 | -5394.81 | -13819.54 | 0.53  | -0.49 |
| 5  | -0.16 | -0.63 | -0.55 | 881.26   | -9000.94  | -1.87 | -0.66 |
| 6  | -0.26 | -0.51 | -0.61 | -6182.35 | 876.09    | 2.29  | -0.36 |
| 7  | -0.19 | -0.79 | -0.70 | -7837.49 | -10494.63 | -1.04 | -0.12 |
| 8  | -0.21 | -0.71 | -0.77 | -5761.15 | -11801.94 | -2.96 | 0.14  |
| 9  | -0.05 | -0.16 | -0.18 | -3949.14 | -14897.65 | 5.70  | 0.61  |
| 10 | 0.24  | -0.83 | -0.74 | -6758.48 | -7571.75  | 18.70 | 2.72  |

Site 4

| Cluster center | NDWI  | MNDWI1 | MNDWI2 | AWEIsh   | AWEInsh   | MuWI_C | MuWI_R |
|----------------|-------|--------|--------|----------|-----------|--------|--------|
| 1              | -0.22 | -0.72  | -0.76  | -127.87  | -6280.94  | 20.63  | 0.16   |
| 2              | -0.04 | -0.67  | -0.70  | -1936.92 | -953.94   | 9.37   | 3.06   |
| 3              | 0.02  | -0.49  | -0.52  | -4496.02 | -12050.34 | -2.17  | -0.29  |
| 4              | -0.29 | -0.63  | -0.66  | -4835.96 | -15416.24 | 0.14   | -0.03  |
| 5              | -0.16 | -0.29  | -0.58  | 1525.60  | -14205.73 | 4.58   | -0.40  |
| 6              | -0.19 | -0.55  | -0.13  | -5178.02 | -9030.85  | -0.64  | -0.51  |
| 7              | -0.13 | -0.59  | -0.46  | -4069.98 | -17050.71 | 2.25   | 0.15   |
| 8              | -0.09 | -0.79  | -0.32  | -6299.19 | -13076.04 | 1.04   | -0.65  |
| 9              | -0.24 | -0.11  | -0.82  | -5562.80 | -10825.84 | -3.18  | -0.17  |
| 10             | -0.26 | -0.42  | -0.62  | -3141.01 | 2183.85   | -1.39  | 0.52   |



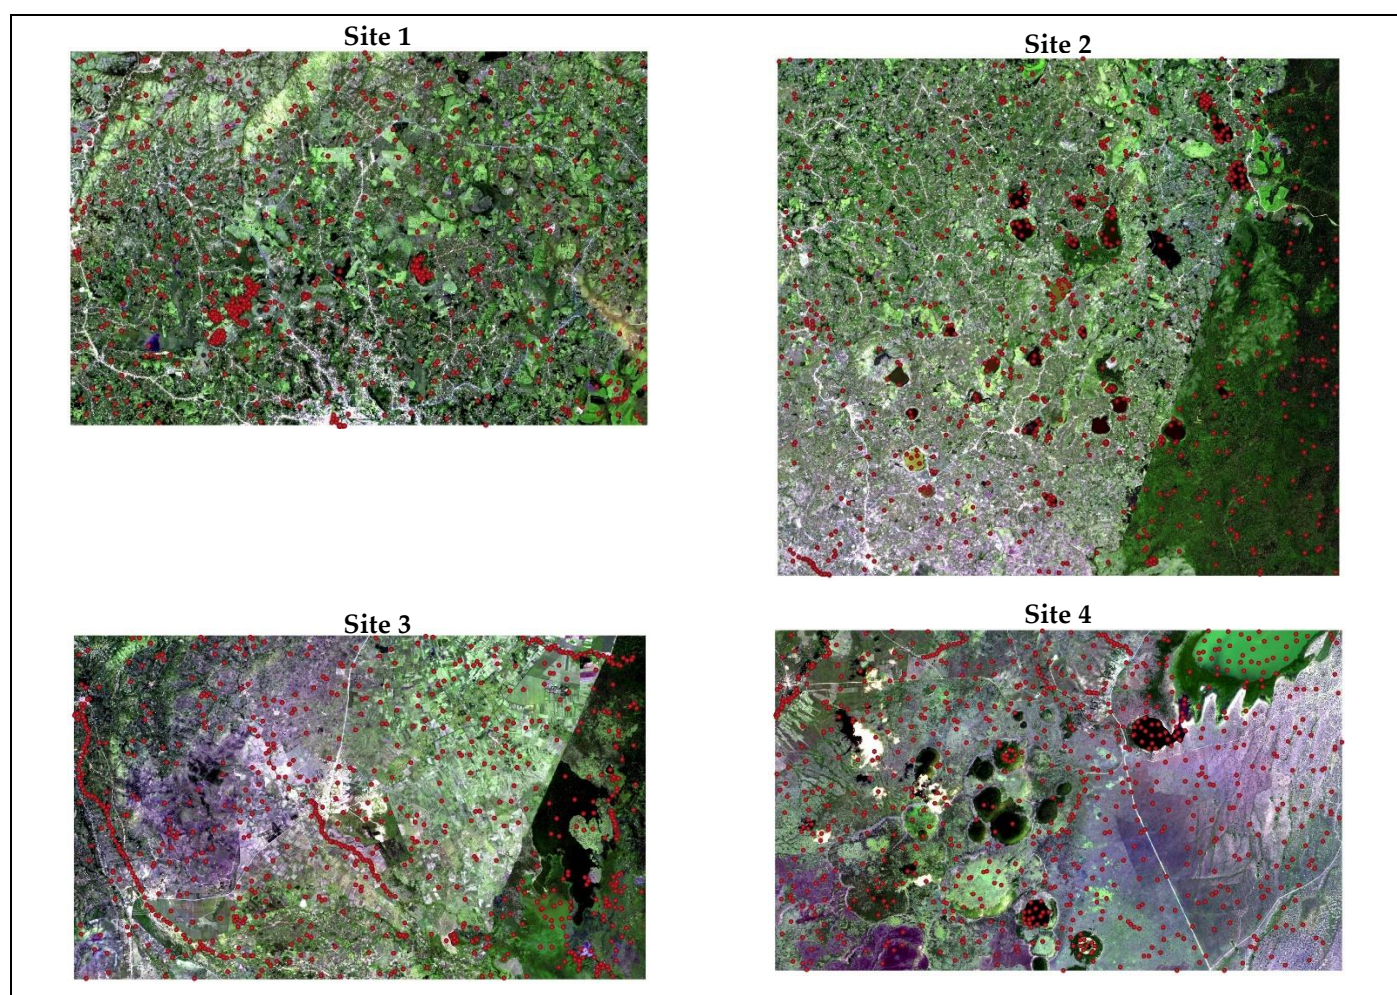

**Figure S6.** RGB images of the studied sites (1, 2, 3, and 4) with the reference points (red) used for the accuracy analysis.

**Table S7.** Confusion matrices of the water indices under the respective studied sites of the Rwenzori region.

| NDWI Site 1 |           |       |       |       |
|-------------|-----------|-------|-------|-------|
| Reference   |           |       |       |       |
| Prediction  | Non-water | Water | Sum   | Users |
| Non-water   | 529.0     | 149.0 | 678.0 | 78.0  |
| Water       | 5.0       | 117.0 | 122.0 | 95.9  |
| Sum         | 534.0     | 26.0  | 800.0 |       |
| Producers   | 99.1      | 44.0  |       | 80.8  |

  

| MNDWI1 Site 1 |           |       |       |       |
|---------------|-----------|-------|-------|-------|
| Reference     |           |       |       |       |
| Prediction    | Non-water | Water | Sum   | Users |
| Non-water     | 520.0     | 103.0 | 623.0 | 83.5  |
| Water         | 14.0      | 163.0 | 177.0 | 92.1  |
| Sum           | 534.0     | 266.0 | 800.0 |       |
| Producers     | 97.0      | 61.3  |       | 85.4  |

  

| MNDWI2 Site 1 |  |  |  |  |
|---------------|--|--|--|--|
| Reference     |  |  |  |  |

| Prediction | Non-water | Water | Sum   | Users |
|------------|-----------|-------|-------|-------|
| Non-water  | 522.0     | 103.0 | 625.0 | 83.5  |
| Water      | 12.0      | 163.0 | 175.0 | 93.1  |
| Sum        | 534.0     | 266.0 | 800.0 |       |
| Producers  | 97.8      | 61.3  |       | 85.6  |

#### AWEISH Site 1

| Reference  |           |       |       |       |
|------------|-----------|-------|-------|-------|
| Prediction | Non-water | Water | Sum   | Users |
| Non-water  | 522.0     | 42.0  | 564.0 | 92.6  |
| Water      | 12.0      | 224.0 | 236.0 | 94.9  |
| Sum        | 534.0     | 266.0 | 800.0 |       |
| Producers  | 97.8      | 84.2  |       | 93.2  |

#### AWEInSH Site 1

| Reference  |           |       |       |       |
|------------|-----------|-------|-------|-------|
| Prediction | Non-water | Water | Sum   | Users |
| Non-water  | 519.0     | 42.0  | 561.0 | 92.5  |
| Water      | 15.0      | 224.0 | 239.0 | 93.7  |
| Sum        | 534.0     | 266.0 | 800.0 |       |
| Producers  | 97.2      | 84.2  |       | 92.9  |

#### MuWI\_C Site 1

| Reference  |           |       |       |       |
|------------|-----------|-------|-------|-------|
| Prediction | Non-water | Water | Sum   | Users |
| Non-water  | 533.0     | 107.0 | 640.0 | 83.3  |
| Water      | 1.0       | 159.0 | 160.0 | 99.4  |
| Sum        | 534.0     | 266.0 | 800.0 |       |
| Producers  | 99.8      | 59.8  |       | 86.5  |

#### MuWI\_R Site 1

| Reference  |           |       |       |       |
|------------|-----------|-------|-------|-------|
| Prediction | Non-water | Water | Sum   | Users |
| Non-water  | 529.0     | 80.0  | 609.0 | 86.9  |
| Water      | 5.0       | 186.0 | 191.0 | 97.4  |
| Sum        | 534.0     | 266.0 | 800.0 |       |
| Producers  | 99.1      | 69.9  |       | 89.4  |

#### NDWI Site 2

| Reference  |           |       |       |       |
|------------|-----------|-------|-------|-------|
| Prediction | Non-water | Water | Sum   | Users |
| Non-water  | 516.0     | 187.0 | 703.0 | 73.4  |
| Water      | 8.0       | 82.0  | 90.0  | 91.1  |
| Sum        | 524.0     | 269.0 | 793.0 |       |

|           |      |      |      |
|-----------|------|------|------|
| Producers | 98.5 | 30.5 | 75.4 |
|-----------|------|------|------|

---

**MNDWI Site 2**


---

Reference

| Prediction | Non-water | Water | Sum   | Users |
|------------|-----------|-------|-------|-------|
| Non-water  | 522.0     | 156.0 | 678.0 | 77.0  |
| Water      | 2.0       | 113.0 | 115.0 | 98.3  |
| Sum        | 524.0     | 269.0 | 793.0 |       |
| Producers  | 99.6      | 42.0  |       | 80.1  |

---

**MNDW2 Site 2**


---

Reference

| Prediction | Non-water | Water | Sum   | Users |
|------------|-----------|-------|-------|-------|
| Non-water  | 503.0     | 126.0 | 629.0 | 80.0  |
| Water      | 21.0      | 143.0 | 164.0 | 87.2  |
| Sum        | 524.0     | 269.0 | 793.0 |       |
| Producers  | 96.0      | 53.2  |       | 81.5  |

---

**AWEISH Site 2**


---

Reference

| Prediction | Non-water | Water | Sum   | Users |
|------------|-----------|-------|-------|-------|
| Non-water  | 514.0     | 59.0  | 573.0 | 89.7  |
| Water      | 10.0      | 210.0 | 220.0 | 95.5  |
| Sum        | 524.0     | 269.0 | 793.0 |       |
| Producers  | 98.1      | 78.1  |       | 91.3  |

---

**AWEInSH  
Site 2**


---

Reference

| Prediction | Non-water | Water | Sum   | Users |
|------------|-----------|-------|-------|-------|
| Non-water  | 521.0     | 50.0  | 571.0 | 91.2  |
| Water      | 3.0       | 219.0 | 222.0 | 98.6  |
| Sum        | 524.0     | 269.0 | 793.0 |       |
| Producers  | 99.4      | 81.4  |       | 93.3  |

---

**MuWI\_C  
Site 2**


---

Reference

| Prediction | Non-water | Water | Sum   | Users |
|------------|-----------|-------|-------|-------|
| Non-water  | 523.0     | 124.0 | 647.0 | 80.8  |
| Water      | 1.0       | 145.0 | 146.0 | 99.3  |
| Sum        | 524.0     | 269.0 | 793.0 |       |
| Producers  | 99.8      | 53.9  |       | 84.2  |

---

**MuWI\_R  
Site 2**


---

Reference



| Prediction | Non-water | Water | Sum   | Users |
|------------|-----------|-------|-------|-------|
| Non-water  | 522.0     | 114.0 | 636.0 | 82.1  |
| Water      | 2.0       | 155.0 | 157.0 | 98.7  |
| Sum        | 524.0     | 269.0 | 793.0 |       |
| Producers  | 99.6      | 57.0  |       | 85.4  |

---

**NDWI Site 3**


---

## Reference

| Prediction | Non-water | Water | Sum   | Users |
|------------|-----------|-------|-------|-------|
| Non-water  | 388.0     | 77.0  | 465.0 | 83.4  |
| Water      | 117.0     | 218.0 | 335.0 | 65.1  |
| Sum        | 505.0     | 295.0 | 800.0 |       |
| Producers  | 76.8      | 73.9  |       | 75.8  |

---

**MNDWI1 Site 3**


---

## Reference

| Prediction | Non-water | Water | Sum   | Users |
|------------|-----------|-------|-------|-------|
| Non-water  | 459.0     | 166.0 | 625.0 | 73.4  |
| Water      | 46.0      | 129.0 | 175.0 | 73.7  |
| Sum        | 505.0     | 295.0 | 800.0 |       |
| Producers  | 90.9      | 43.7  |       | 73.5  |

---

**MNDWI2 Site 3**


---

## Reference

| Prediction | Non-water | Water | Sum   | Users |
|------------|-----------|-------|-------|-------|
| Non-water  | 462.0     | 172.0 | 634.0 | 729.0 |
| Water      | 43.0      | 123.0 | 166.0 | 74.1  |
| Sum        | 505.0     | 295.0 | 800.0 |       |
| Producers  | 91.5      | 41.7  |       | 73.1  |

---

**AWEISH Site 3**


---

## Reference

| Prediction | Non-water | Water | Sum   | Users |
|------------|-----------|-------|-------|-------|
| Non-water  | 489.0     | 87.0  | 576.0 | 84.9  |
| Water      | 16.0      | 208.0 | 224.0 | 92.9  |
| Sum        | 505.0     | 295.0 | 800.0 |       |
| Producers  | 96.8      | 70.5  |       | 87.0  |

---

**AWEInSH  
Site 3**


---

## Reference

| Prediction | Non-water | Water | Sum   | Users |
|------------|-----------|-------|-------|-------|
| Non-water  | 466.0     | 82.0  | 548.0 | 85.0  |
| Water      | 39.0      | 213.0 | 252.0 | 84.5  |
| Sum        | 505.0     | 295.0 | 800.0 |       |
| Producers  | 92.3      | 72.2  |       | 84.9  |

| <b>MuWI_C</b> |           |       |       |       |
|---------------|-----------|-------|-------|-------|
| <b>Site 3</b> |           |       |       |       |
| Reference     |           |       |       |       |
| Prediction    | Non-water | Water | Sum   | Users |
| Non-water     | 463.0     | 181.0 | 644.0 | 71.9  |
| Water         | 42.0      | 114.0 | 156.0 | 73.1  |
| Sum           | 505.0     | 295.0 | 800.0 |       |
| Producers     | 91.7      | 38.6  |       | 72.1  |

| <b>MuWI_R</b> |           |       |       |       |
|---------------|-----------|-------|-------|-------|
| <b>Site 3</b> |           |       |       |       |
| Reference     |           |       |       |       |
| Prediction    | Non-water | Water | Sum   | Users |
| Non-water     | 456.0     | 181.0 | 637.0 | 71.6  |
| Water         | 49.0      | 114.0 | 163.0 | 69.9  |
| Sum           | 505.0     | 295.0 | 800.0 |       |
| Producers     | 90.3      | 38.6  |       | 71.2  |

| <b>NDWI Site 4</b> |           |       |       |       |
|--------------------|-----------|-------|-------|-------|
| Reference          |           |       |       |       |
| Prediction         | Non-water | Water | Sum   | Users |
| Non-water          | 592.0     | 135.0 | 727.0 | 81.4  |
| Water              | 34.0      | 39.0  | 73.0  | 53.4  |
| Sum                | 626.0     | 174.0 | 800.0 |       |
| Producers          | 94.6      | 22.4  |       | 78.9  |

| <b>MNDWI Site 4</b> |           |       |       |       |
|---------------------|-----------|-------|-------|-------|
| Reference           |           |       |       |       |
| Prediction          | Non-water | Water | Sum   | Users |
| Non-water           | 616.0     | 110.0 | 726.0 | 84.8  |
| Water               | 10.0      | 64.0  | 74.0  | 86.5  |
| Sum                 | 626.0     | 174.0 | 800.0 |       |
| Producers           | 98.4      | 36.8  |       | 85.0  |

| <b>MNDW2 Site 4</b> |           |       |       |       |
|---------------------|-----------|-------|-------|-------|
| Reference           |           |       |       |       |
| Prediction          | Non-water | Water | Sum   | Users |
| Non-water           | 616.0     | 113.0 | 729.0 | 84.5  |
| Water               | 10.0      | 61.0  | 71.0  | 85.9  |
| Sum                 | 626.0     | 174.0 | 800.0 |       |
| Producers           | 98.4      | 35.1  |       | 84.6  |

| <b>AWEISH Site 4</b> |           |       |       |       |
|----------------------|-----------|-------|-------|-------|
| Reference            |           |       |       |       |
| Prediction           | Non-water | Water | Sum   | Users |
| Non-water            | 612.0     | 79.0  | 691.0 | 88.6  |
| Water                | 14.0      | 65.0  | 109.0 | 87.2  |

|                |           |       |       |       |
|----------------|-----------|-------|-------|-------|
| Sum            | 626.0     | 174.0 | 800.0 |       |
| Producers      | 97.8      | 54.6  |       | 88.4  |
| <b>AWEInSH</b> |           |       |       |       |
| <b>Site 4</b>  |           |       |       |       |
| Reference      |           |       |       |       |
| Prediction     | Non-water | Water | Sum   | Users |
| Non-water      | 588.0     | 57.0  | 645.0 | 91.2  |
| Water          | 38.0      | 117.0 | 155.0 | 75.5  |
| Sum            | 626.0     | 174.0 | 800.0 |       |
| Producers      | 93.9      | 67.2  |       | 88.1  |
| <b>MuWI_C</b>  |           |       |       |       |
| <b>Site 4</b>  |           |       |       |       |
| Reference      |           |       |       |       |
| Prediction     | Non-water | Water | Sum   | Users |
| Non-water      | 601.0     | 83.0  | 684.0 | 87.9  |
| Water          | 25.0      | 91.0  | 116.0 | 78.4  |
| Sum            | 626.0     | 174.0 | 800.0 |       |
| Producers      | 96.0      | 52.3  |       | 86.5  |
| <b>MuWI_R</b>  |           |       |       |       |
| <b>Site 4</b>  |           |       |       |       |
| Reference      |           |       |       |       |
| Prediction     | Non-water | Water | Sum   | Users |
| Non-water      | 610.0     | 80.0  | 690.0 | 88.4  |
| Water          | 16.0      | 94.0  | 110.0 | 85.5  |
| Sum            | 626.0     | 174.0 | 800.0 |       |
| Producers      | 97.4      | 54.0  |       | 88.0  |

**Table S8.** 39 extracted crater lakes by AWEI from site 2 with their approximate area (m<sup>2</sup>/ha). The crater lakes are arranged according to ascending order in surface area.

|    | Name         | ID  | AREA (m2) | Area (ha) |
|----|--------------|-----|-----------|-----------|
| 1  | Mwitampungu  | S39 | 598.518   | 0.06      |
| 2  | not named    | S21 | 5585.664  | 0.56      |
| 3  | Kanyabutete  | S1  | 11670.581 | 1.17      |
| 4  | Kanyanchu    | S38 | 19150.344 | 1.92      |
| 5  | Kanyamukali  | S37 | 22844.808 | 2.28      |
| 6  | Nkuruba      | S20 | 29325.209 | 2.93      |
| 7  | Nyahira      | S24 | 30423.428 | 3.04      |
| 8  | Nyanswiga    | S29 | 33116.578 | 3.31      |
| 9  | Wandakara    | S35 | 34713.717 | 3.47      |
| 10 | Kanyamansira | S2  | 45084.799 | 4.51      |
| 11 | Kisibendi    | S7  | 48975.157 | 4.90      |
| 12 | Kasenda      | S3  | 74412.127 | 7.44      |
| 13 | Lugembe      | S11 | 86782.485 | 8.68      |



|    |              |     |            |       |
|----|--------------|-----|------------|-------|
| 14 | Rukwanzi     | S33 | 97256.79   | 9.73  |
| 15 | Ndicho       | S19 | 98255.93   | 9.83  |
| 16 | Nyamugosani  | S28 | 104848.075 | 10.48 |
| 17 | Nyarayabana  | S30 | 114121.349 | 11.41 |
| 18 | Nyamugoro    | S27 | 115819.063 | 11.58 |
| 19 | Kitere       | S8  | 116211.009 | 11.62 |
| 20 | Kyanga       | S9  | 124399.958 | 12.44 |
| 21 | Kyerbwato    | S10 | 126571.77  | 12.66 |
| 22 | Lyantonde    | S12 | 145535.62  | 14.55 |
| 23 | Kifuruka     | S6  | 153214.321 | 15.32 |
| 24 | Mbajo        | S13 | 171073.585 | 17.11 |
| 25 | Mubiro       | S14 | 189236.222 | 18.92 |
| 26 | Nyamirima    | S25 | 192004.259 | 19.20 |
| 27 | Wankenzi     | S36 | 198209.382 | 19.82 |
| 28 | Rwenjuba     | S34 | 221551.189 | 22.16 |
| 29 | Murusi       | S16 | 229918.547 | 22.99 |
| 30 | Murigamire   | S15 | 280892.947 | 28.09 |
| 31 | Nyamitezi    | S26 | 308760.653 | 30.88 |
| 32 | Kerere       | S5  | 331649.906 | 33.16 |
| 33 | Ntambi       | S22 | 334196.449 | 33.42 |
| 34 | Mwegenyi     | S18 | 340559.604 | 34.06 |
| 35 | Nyinabulitwa | S31 | 388293.517 | 38.83 |
| 36 | Katanda      | S4  | 398316.399 | 39.83 |
| 37 | Mwamba       | S17 | 431924.014 | 43.19 |
| 38 | Nyabikere    | S23 | 456212.561 | 45.62 |
| 39 | Nyinambuga   | S32 | 593302.906 | 59.33 |
